# Supplementary material
Source: publisher figshare collection journal article supplement (https://karger.figshare.com/ndownloader/files/22878587)
Supplement: Supplementary file 1 [file 22878587]

# Online Supplemental data

**Supplemental Table E.2 – Pair-wise AUC comparison of ROC curves computed from strain elastography measurements in individual centers**.

|  | **Nijmegen** | **Amsterdam** | **Bologna** | **Firenze** | **Fano** |
| --- | --- | --- | --- | --- | --- |
| **Nijmegen** | - | 0.41 | 0.17 | 0.06 | 0.47 |
| **Amsterdam** | - | - | 0.13 | 0.07 | 0.25 |
| **Bologna** | - |  | - | 0.59 | 0.97 |
| **Firenze** | - | - | - | - | 0.71 |
| **Fano** | - | - | - | - | - |

**Supplemental Table E.2 – Pair-wise AUC comparison of ROC curves computed from strain elastography measurements in individual centers**.

P-value as found by statistical testing. Data was assumed unpaired as different measurements were obtained in every hospital. Differences were assessed two-sided.
